# Supplementary material
Source: Springer Nature journal article supplement (https://www.springermedizin.de/resource/supplementary/13002_2012_271_MOESM4_ESM.pdf/9627528)

## Technologies used in Praia Grande

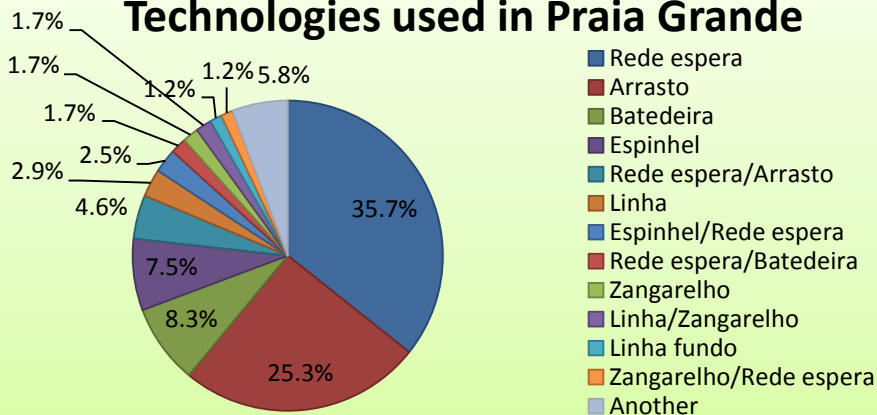

## Technologies used in Tarituba

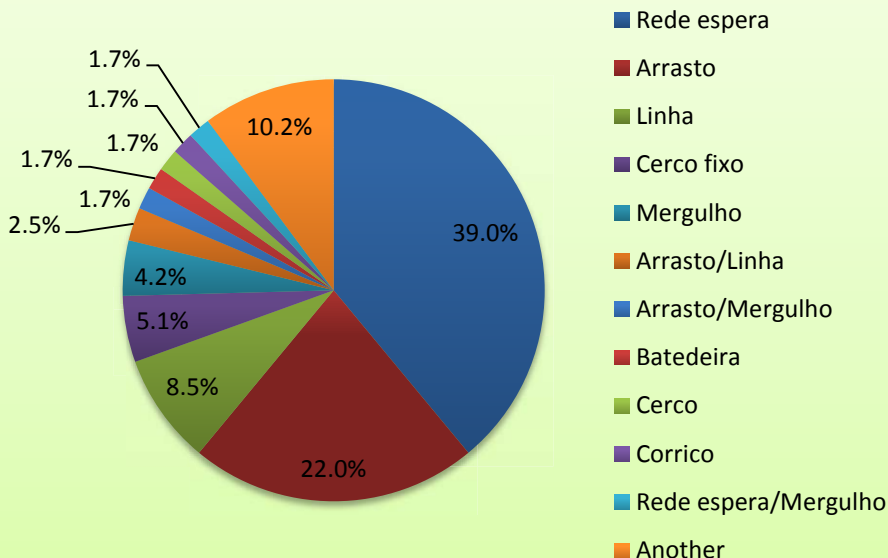

Supplement: MOESM4 [file 9627528]
